# Supplementary material
Source: PubMed Central journal article supplement (PMC4261965)

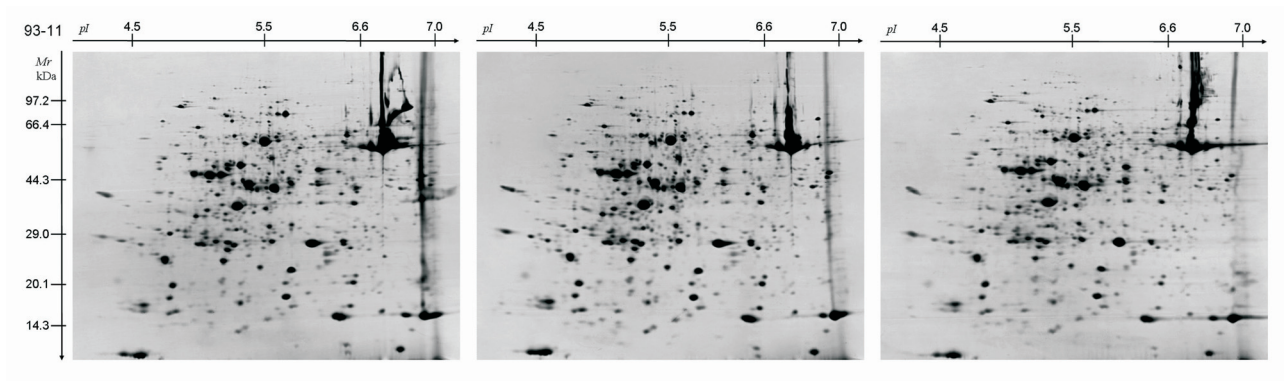

**Figure S1** - Triplicate gel images for 93-11.

Supplement: gmb-37-652-s001.pdf [file gmb-37-652-s001.pdf]

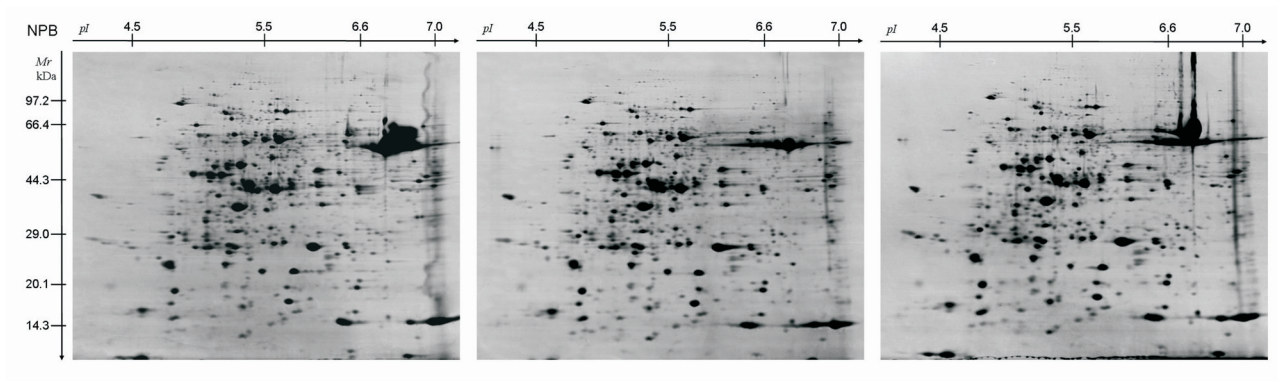

**Figure S2** - Triplicate gel images for Nipponbare.

Supplement: gmb-37-652-s002.pdf [file gmb-37-652-s002.pdf]

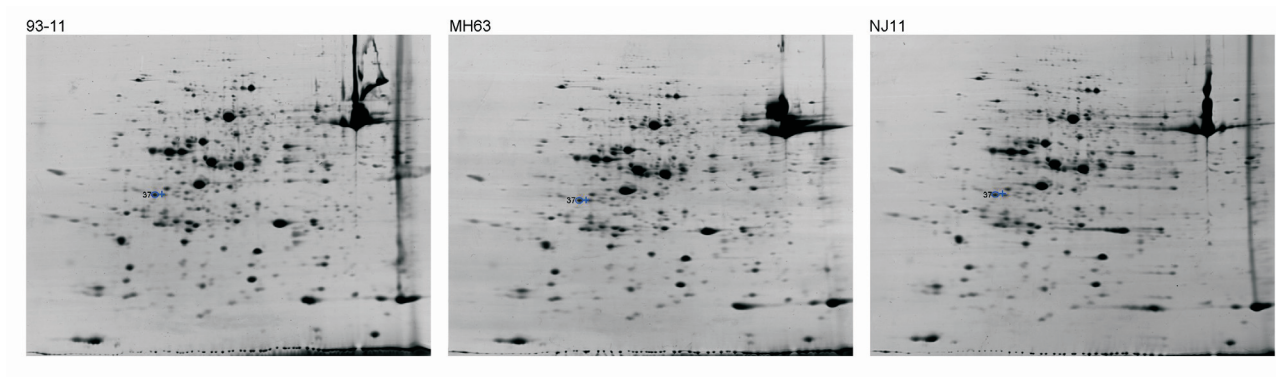

**Figure S3** - Complete gel images of the *indica* varieties.

Supplement: gmb-37-652-s003.pdf [file gmb-37-652-s003.pdf]

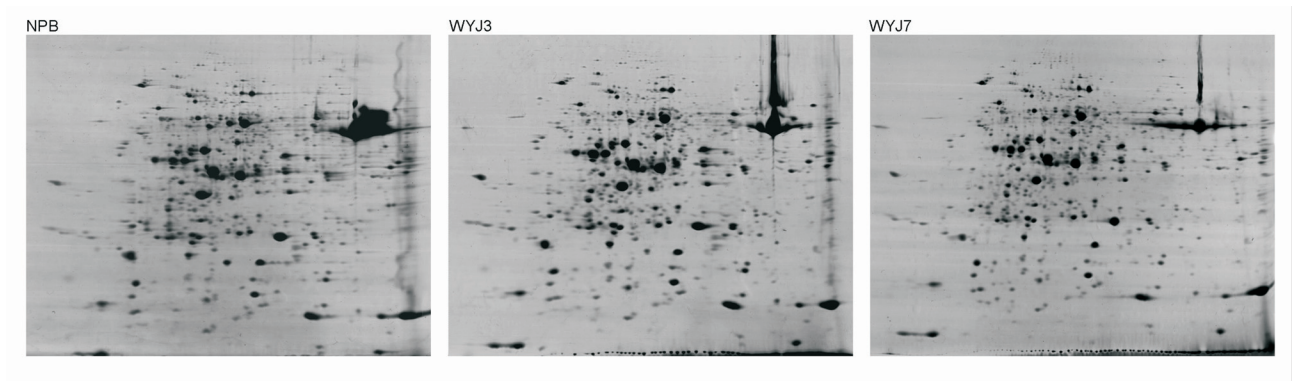

**Figure S4** - Complete gel images of the *japonica* varieties.

Supplement: gmb-37-652-s004.pdf [file gmb-37-652-s004.pdf]
